# Supplementary material for: Evaluating the Role of Parental Education and Adolescent Health Problems in Educational Attainment
Source: Springer Nature journal article supplement (doi:10.1007/s13524-020-00919-y), 2020-10-01

**Table A1** Numbers of siblings discordant in health status according to parental education and the type of health problem

| Health problems     | Overall | Parental education |           |       |
|---------------------|---------|--------------------|-----------|-------|
|                     |         | Tertiary           | Secondary | Basic |
| Somatic condition   | 24,459  | 12,399             | 10,560    | 1,500 |
| Frequent infections | 21,863  | 11,098             | 9,527     | 1,238 |
| Mental disorder     | 15,788  | 7,334              | 7,171     | 1,283 |

**Table A2** Adjusted linear probability models (beta coefficients, b, and robust standard errors, se) for secondary education at age 27 with interactions between different types of health problems and parental education

| Covariates <sup>a</sup>          | Somatic conditions |        | Frequent infections |        | Mental disorders |        |
|----------------------------------|--------------------|--------|---------------------|--------|------------------|--------|
|                                  | b                  | se     | b                   | se     | b                | se     |
| Parental education (tertiary)    |                    |        |                     |        |                  |        |
| Secondary                        | -.063***           | (.001) | -.063***            | (.001) | -.057***         | (.001) |
| Basic                            | -.158***           | (.003) | -.157***            | (.003) | -.146***         | (.003) |
| Somatic condition                | -.024***           | (.002) |                     |        |                  |        |
| Secondary X Somatic condition    | -.005              | (.004) |                     |        |                  |        |
| Basic X Somatic condition        | .000               | (.010) |                     |        |                  |        |
| Frequent infections              |                    |        | -.015***            | (.002) |                  |        |
| Secondary X Frequent infections  |                    |        | -.000               | (.004) |                  |        |
| Basic X Frequent infections      |                    |        | -.009               | (.010) |                  |        |
| Mental disorder                  |                    |        |                     |        | -.123***         | (.004) |
| Secondary X Mental disorder      |                    |        |                     |        | -.080***         | (.006) |
| Basic X Mental disorder          |                    |        |                     |        | -.116***         | (.012) |
| Sex (male)                       |                    |        |                     |        |                  |        |
| Female                           | .042***            | (.001) | .042***             | (.001) | .044***          | (.001) |
| Birth year (1986)                |                    |        |                     |        |                  |        |
| 1987                             | .008***            | (.002) | .007***             | (.002) | .008***          | (.002) |
| 1988                             | .006***            | (.002) | .005**              | (.002) | .008***          | (.002) |
| 1989                             | .010***            | (.002) | .009***             | (.002) | .011***          | (.002) |
| 1990                             | .013***            | (.002) | .012***             | (.002) | .015***          | (.002) |
| 1991                             | .016***            | (.002) | .016***             | (.002) | .019***          | (.002) |
| Maternal age, linear             | .028***            | (.001) | .028***             | (.001) | .026***          | (.001) |
| Maternal age, squared            | -.000***           | (.000) | -.000***            | (.000) | -.000***         | (.000) |
| Mother tongue (Finnish)          |                    |        |                     |        |                  |        |
| Swedish                          | .028***            | (.002) | .028***             | (.002) | .025***          | (.002) |
| Other                            | -.059***           | (.006) | -.059***            | (.006) | -.060***         | (.006) |
| Family type (two parents)        |                    |        |                     |        |                  |        |
| Mother only                      | -.071***           | (.002) | -.071***            | (.002) | -.064***         | (.002) |
| Father only                      | -.080***           | (.004) | -.081***            | (.004) | -.073***         | (.004) |
| Sibship size                     | -.008***           | (.000) | -.008***            | (.000) | -.008***         | (.000) |
| Urban-rural class. (inner-urban) |                    |        |                     |        |                  |        |
| Outer urban                      | .007***            | (.002) | .007***             | (.002) | .007***          | (.002) |
| Peri-urban                       | .016***            | (.002) | .016***             | (.002) | .015***          | (.002) |
| Local centers in rural areas     | .014***            | (.002) | .014***             | (.002) | .013***          | (.002) |
| Rural areas close to urban       | .014***            | (.002) | .014***             | (.002) | .013***          | (.002) |
| Rural heartland                  | .021***            | (.002) | .021***             | (.002) | .019***          | (.002) |
| Sparsely populated rural         | .024***            | (.002) | .024***             | (.002) | .021***          | (.002) |
| Constant                         | .448***            | (.016) | .448***             | (.016) | .488***          | (.016) |
| N                                | 352,899            |        | 352,899             |        | 352,899          |        |

\* p < .05 \*\* p < .01 \*\*\* p < .001

<sup>a</sup>Reference category is shown in parentheses. Region of residence is omitted because of the large number of categories ( $n = 18$ ).

**Table A3** Adjusted linear probability models (beta coefficients, b, and robust standard errors, se) for tertiary education at age 27 with interactions between different types of health problems and parental education

| Covariates <sup>a</sup>          | Somatic conditions |        | Frequent infections |        | Mental disorders |        |
|----------------------------------|--------------------|--------|---------------------|--------|------------------|--------|
|                                  | b                  | se     | b                   | se     | b                | se     |
| Parental education (tertiary)    |                    |        |                     |        |                  |        |
| Secondary                        | -.206***           | (.002) | -.205***            | (.002) | -.207***         | (.002) |
| Basic                            | -.283***           | (.003) | -.283***            | (.003) | -.286***         | (.003) |
| Somatic condition                | -.041***           | (.005) |                     |        |                  |        |
| Secondary X Somatic condition    | .012*              | (.006) |                     |        |                  |        |
| Basic X Somatic condition        | .005               | (.011) |                     |        |                  |        |
| Frequent infections              |                    |        | -.013**             | (.004) |                  |        |
| Secondary X Frequent infections  |                    |        | -.002               | (.006) |                  |        |
| Basic X Frequent infections      |                    |        | .002                | (.011) |                  |        |
| Mental disorder                  |                    |        |                     |        | -.176***         | (.006) |
| Secondary X Mental disorder      |                    |        |                     |        | .051***          | (.007) |
| Basic X Mental disorder          |                    |        |                     |        | .091***          | (.011) |
| Sex (male)                       |                    |        |                     |        |                  |        |
| Female                           | .165***            | (.002) | .164***             | (.002) | .167***          | (.002) |
| Birth year (1986)                |                    |        |                     |        |                  |        |
| 1987                             | -.003              | (.003) | -.003               | (.003) | -.003            | (.003) |
| 1988                             | -.010***           | (.003) | -.010***            | (.003) | -.009**          | (.003) |
| 1989                             | -.016***           | (.003) | -.017***            | (.003) | -.015***         | (.003) |
| 1990                             | -.025***           | (.003) | -.026***            | (.003) | -.024***         | (.003) |
| 1991                             | -.028***           | (.003) | -.029***            | (.003) | -.026***         | (.003) |
| Maternal age, linear             | .043***            | (.001) | .043***             | (.001) | .041***          | (.001) |
| Maternal age, squared            | -.001***           | (.000) | -.001***            | (.000) | -.001***         | (.000) |
| Mother tongue (Finnish)          |                    |        |                     |        |                  |        |
| Swedish                          | .071***            | (.005) | .071***             | (.005) | .069***          | (.005) |
| Other                            | -.023**            | (.008) | -.023**             | (.008) | -.023**          | (.008) |
| Family type (two parents)        |                    |        |                     |        |                  |        |
| Mother only                      | -.096***           | (.002) | -.097***            | (.002) | -.092***         | (.002) |
| Father only                      | -.092***           | (.005) | -.092***            | (.005) | -.088***         | (.005) |
| Sibship size                     | -.016***           | (.001) | -.016***            | (.001) | -.016***         | (.001) |
| Urban-rural class. (inner-urban) |                    |        |                     |        |                  |        |
| Outer urban                      | -.009***           | (.003) | -.009**             | (.003) | -.009***         | (.003) |
| Peri-urban                       | -.026***           | (.003) | -.026***            | (.003) | -.026***         | (.003) |
| Local centers in rural areas     | -.009*             | (.004) | -.009*              | (.004) | -.010*           | (.004) |
| Rural areas close to urban       | -.034***           | (.004) | -.034***            | (.004) | -.034***         | (.004) |
| Rural heartland                  | -.014***           | (.003) | -.014***            | (.003) | -.015***         | (.003) |
| Sparsely populated rural         | -.027***           | (.004) | -.026***            | (.004) | -.027***         | (.004) |
| Constant                         | -.252***           | (.022) | -.254***            | (.022) | -.228***         | (.022) |
| N                                | 318,202            |        | 318,202             |        | 318,202          |        |

\* p < .05 \*\* p < .01 \*\*\* p < .001

<sup>a</sup>Reference category is shown in parentheses. Region of residence is omitted because of the large number of categories ( $n = 18$ ).

**Table A4** Sibling fixed-effects linear probability models (beta coefficients, b, and robust standard errors, se) for secondary education at age 27 with interactions between different types of health problems and parental education

| Covariates <sup>a</sup>         | Somatic conditions |        | Frequent infections |        | Mental disorders |        |
|---------------------------------|--------------------|--------|---------------------|--------|------------------|--------|
|                                 | b                  | se     | b                   | se     | b                | se     |
| Somatic condition (tertiary)    | -.018***           | (.004) |                     |        |                  |        |
| Secondary X Somatic condition   | -.012              | (.007) |                     |        |                  |        |
| Basic X Somatic condition       | .020               | (.020) |                     |        |                  |        |
| Frequent infections (tertiary)  |                    |        | -.021***            | (.004) |                  |        |
| Secondary X Frequent infections |                    |        | -.009               | (.007) |                  |        |
| Basic X Frequent infections     |                    |        | .017                | (.022) |                  |        |
| Mental disorder (tertiary)      |                    |        |                     |        | -.096***         | (.007) |
| Secondary X Mental disorder     |                    |        |                     |        | -.044***         | (.012) |
| Basic X Mental disorder         |                    |        |                     |        | -.042            | (.025) |
| Sex (male)                      |                    |        |                     |        |                  |        |
| Female                          | .047***            | (.002) | .047***             | (.002) | .046***          | (.002) |
| Birth year (1986)               |                    |        |                     |        |                  |        |
| 1987                            | .006*              | (.003) | .007*               | (.003) | .006             | (.003) |
| 1988                            | .001               | (.003) | .002                | (.003) | .000             | (.003) |
| 1989                            | .002               | (.003) | .003                | (.003) | .001             | (.003) |
| 1990                            | .002               | (.003) | .004                | (.003) | .001             | (.003) |
| 1991                            | .007*              | (.003) | .008**              | (.003) | .005             | (.003) |
| Constant                        | .883***            | (.002) | .886***             | (.002) | .884***          | (.002) |
| N                               | 163,430            |        | 163,430             |        | 163,430          |        |

\* p < .05 \*\* p<.01 \*\*\* p<.001

<sup>a</sup>Reference category is shown in parentheses.

**Table A5** Sibling fixed-effects linear probability models (beta coefficients, b, and robust standard errors, se) for tertiary education at age 27 with interactions between different types of health problems and parental education

| Covariates <sup>a</sup>         | Somatic conditions |        | Frequent infections |        | Mental disorders |        |
|---------------------------------|--------------------|--------|---------------------|--------|------------------|--------|
|                                 | b                  | se     | b                   | se     | b                | se     |
| Somatic condition (tertiary)    | -.011              | (.008) |                     |        |                  |        |
| Secondary X Somatic condition   | .009               | (.012) |                     |        |                  |        |
| Basic X Somatic condition       | -.043              | (.026) |                     |        |                  |        |
| Frequent infections (tertiary)  |                    |        | -.017               | (.009) |                  |        |
| Secondary X Frequent infections |                    |        | -.021               | (.013) |                  |        |
| Basic X Frequent infections     |                    |        | .016                | (.027) |                  |        |
| Mental disorder (tertiary)      |                    |        |                     |        | -.127***         | (.011) |
| Secondary X Mental disorder     |                    |        |                     |        | .040*            | (.016) |
| Basic X Mental disorder         |                    |        |                     |        | .057             | (.030) |
| Sex (male)                      |                    |        |                     |        |                  |        |
| Female                          | .171***            | (.003) | .171***             | (.003) | .172***          | (.003) |
| Birth year (1986)               |                    |        |                     |        |                  |        |
| 1987                            | -.010              | (.006) | -.010               | (.006) | -.010            | (.006) |
| 1988                            | -.029***           | (.005) | -.030***            | (.005) | -.028***         | (.005) |
| 1989                            | -.035***           | (.005) | -.036***            | (.005) | -.034***         | (.005) |
| 1990                            | -.056***           | (.005) | -.057***            | (.005) | -.054***         | (.005) |
| 1991                            | -.065***           | (.005) | -.066***            | (.005) | -.064***         | (.005) |
| Constant                        | .349***            | (.004) | .351***             | (.004) | .351***          | (.004) |
| N                               | 138,852            |        | 138,852             |        | 138,852          |        |

\* p < .05 \*\* p<.01 \*\*\* p<.001

<sup>a</sup>Reference category is shown in parentheses.

**Table A6** Decomposition of the total effect of parental education on offspring secondary ( $n = 352,899$ ) and tertiary ( $n = 318,202$ ) education into a controlled direct effect and a portion eliminated, following a hypothetical eradication of somatic conditions, frequent infections, or mental disorders

| <b>I) Somatic conditions</b>                                                  |                   |                          |                      |
|-------------------------------------------------------------------------------|-------------------|--------------------------|----------------------|
| <i>A. Secondary education</i>                                                 |                   |                          |                      |
| Parental education                                                            | Total effect      | Controlled direct effect | Portion eliminated   |
| Basic (ref.)                                                                  |                   |                          |                      |
| Secondary                                                                     | .113 (.107, .119) | .113 (.107, .119)        | -.001 (-.002, .002)  |
| Tertiary                                                                      | .186 (.180, .192) | .185 (.179, .192)        | .001 (-.001, .002)   |
| <i>B. Tertiary education (among those with completed secondary education)</i> |                   |                          |                      |
| Parental education                                                            | Total effect      | Controlled direct effect | Portion eliminated   |
| Basic (ref.)                                                                  |                   |                          |                      |
| Secondary                                                                     | .083 (.076, .089) | .082 (.075, .089)        | .001 (-.001, .002)   |
| Tertiary                                                                      | .310 (.304, .316) | .310 (.304, .317)        | .000 (-.002, .001)   |
| <b>II) Frequent infections</b>                                                |                   |                          |                      |
| <i>A. Secondary education</i>                                                 |                   |                          |                      |
| Parental education                                                            | Total effect      | Controlled direct effect | Portion eliminated   |
| Basic (ref.)                                                                  |                   |                          |                      |
| Secondary                                                                     | .113 (.107, .119) | .106 (.099, .113)        | .007 (.002, .011)    |
| Tertiary                                                                      | .186 (.180, .192) | .177 (.170, .184)        | .009 (.005, .013)    |
| <i>B. Tertiary education (among those with completed secondary education)</i> |                   |                          |                      |
| Parental education                                                            | Total effect      | Controlled direct effect | Portion eliminated   |
| Basic (ref.)                                                                  |                   |                          |                      |
| Secondary                                                                     | .083 (.076, .089) | .086 (.078, .094)        | -.003 (-.008, .001)  |
| Tertiary                                                                      | .310 (.304, .316) | .315 (.307, .324)        | -.005 (-.010, .000)  |
| <b>III) Mental disorders</b>                                                  |                   |                          |                      |
| <i>A. Secondary education</i>                                                 |                   |                          |                      |
| Parental education                                                            | Total effect      | Controlled direct effect | Portion eliminated   |
| Basic (ref.)                                                                  |                   |                          |                      |
| Secondary                                                                     | .113 (.107, .119) | .107 (.101, .113)        | .006 (.004, .008)    |
| Tertiary                                                                      | .186 (.180, .192) | .174 (.169, .180)        | .012 (.010, .014)    |
| <i>B. Tertiary education (among those with completed secondary education)</i> |                   |                          |                      |
| Parental education                                                            | Total effect      | Controlled direct effect | Portion eliminated   |
| Basic (ref.)                                                                  |                   |                          |                      |
| Secondary                                                                     | .083 (.076, .089) | .084 (.077, .090)        | -.001 (-.002, .000)  |
| Tertiary                                                                      | .310 (.304, .316) | .313 (.306, .319)        | -.003 (-.004, -.001) |

**Table A7** Sex-specific decomposition of the total effect of parental education on offspring secondary and tertiary education into a controlled direct effect and a portion eliminated, following a hypothetical eradication of health problems

| <b>I) Men</b>                                                                              |                   |                          |                      |
|--------------------------------------------------------------------------------------------|-------------------|--------------------------|----------------------|
| <i>A. Secondary education (n = 180,348)</i>                                                |                   |                          |                      |
| Parental education                                                                         | Total effect      | Controlled direct effect | Portion eliminated   |
| Basic (ref.)                                                                               |                   |                          |                      |
| Secondary                                                                                  | .121 (.113, .129) | .113 (.103, .124)        | .007 (.001, .015)    |
| Tertiary                                                                                   | .205 (.197, .213) | .192 (.182, .202)        | .015 (.010, .020)    |
| <i>B. Tertiary education (among those with completed secondary education; n = 158,913)</i> |                   |                          |                      |
| Parental education                                                                         | Total effect      | Controlled direct effect | Portion eliminated   |
| Basic (ref.)                                                                               |                   |                          |                      |
| Secondary                                                                                  | .071 (.063, .078) | .075 (.065, .085)        | -.004 (-.010, .002)  |
| Tertiary                                                                                   | .288 (.280, .295) | .296 (.287, .306)        | -.008 (-.015, -.003) |
| <b>II) Women</b>                                                                           |                   |                          |                      |
| <i>A. Secondary education (n = 172,551)</i>                                                |                   |                          |                      |
| Parental education                                                                         | Total effect      | Controlled direct effect | Portion eliminated   |
| Basic (ref.)                                                                               |                   |                          |                      |
| Secondary                                                                                  | .104 (.097, .112) | .090 (.081, .100)        | .014 (.008, .020)    |
| Tertiary                                                                                   | .166 (.158, .174) | .143 (.134, .151)        | .024 (.018, .029)    |
| <i>B. Tertiary education (among those with completed secondary education; n = 159,289)</i> |                   |                          |                      |
| Parental education                                                                         | Total effect      | Controlled direct effect | Portion eliminated   |
| Basic (ref.)                                                                               |                   |                          |                      |
| Secondary                                                                                  | .095 (.085, .104) | .097 (.084, .110)        | -.002 (-.010, .006)  |
| Tertiary                                                                                   | .335 (.326, .344) | .340 (.326, .352)        | -.005 (-.013, .004)  |

**Table A8** Prevalence of somatic conditions, frequent infections, and mental disorders (%) at ages 10–16 by parental education ( $n = 352,899$ )

| Parental education   | Somatic    | Infection  | Mental     |
|----------------------|------------|------------|------------|
| Tertiary             | 7.7        | 8.7        | 4.9        |
| Secondary            | 8.4        | 9.5        | 6.2        |
| Basic                | 8.7        | 9.6        | 8.2        |
| P-value <sup>a</sup> | $p < .001$ | $p < .001$ | $p < .001$ |

<sup>a</sup>Chi-squared tests test the equality of prevalence.



**Table A9** Difference in the probability of secondary and tertiary education at age 27 by the presence of health problems at ages 10–16, assuming students will eventually complete the degree they are pursuing, with 95% confidence intervals shown in parentheses

| <i>A. Secondary education</i>                                                 |                         |                         |                         |                         |                         |
|-------------------------------------------------------------------------------|-------------------------|-------------------------|-------------------------|-------------------------|-------------------------|
| Health problem                                                                | Model 1                 | Model 2                 | Model 3                 | Model 4                 | Model 5                 |
| Somatic condition                                                             | -.024<br>(-.028, -.021) | -.022<br>(-.026, -.019) | -.014<br>(-.018, -.011) | -.018<br>(-.025, -.012) | -.013<br>(-.020, -.007) |
| Frequent infections                                                           | -.012<br>(-.017, -.009) | -.014<br>(-.017, -.011) | -.008<br>(-.011, -.005) | -.020<br>(-.027, -.014) | -.017<br>(-.024, -.011) |
| Mental disorder                                                               | -.154<br>(-.160, -.148) | -.134<br>(-.140, -.129) | -.133<br>(-.138, -.127) | -.098<br>(-.108, -.087) | -.096<br>(-.107, -.086) |
| Birth year and sex                                                            | Yes                     | Yes                     | Yes                     | Yes                     | Yes                     |
| Other control variables <sup>a</sup>                                          | No                      | Yes                     | Yes                     | No                      | No                      |
| Mutually adjusted                                                             | No                      | No                      | Yes                     | No                      | Yes                     |
| Sibling fixed effects                                                         | No                      | No                      | No                      | Yes                     | Yes                     |
| N                                                                             | 352,899                 | 352,899                 | 352,899                 | 163,430                 | 163,430                 |
| <i>B. Tertiary education (among those with completed secondary education)</i> |                         |                         |                         |                         |                         |
| Health problem                                                                | Model 1                 | Model 2                 | Model 3                 | Model 4                 | Model 5                 |
| Somatic condition                                                             | -.044<br>(-.050, -.038) | -.037<br>(-.043, -.031) | -.030<br>(-.036, -.024) | -.021<br>(-.033, -.009) | -.017<br>(-.029, -.005) |
| Frequent infections                                                           | -.015<br>(-.021, -.009) | -.013<br>(-.019, -.007) | -.006<br>(-.012, -.001) | -.016<br>(-.029, -.004) | -.013<br>(-.026, -.001) |
| Mental disorder                                                               | -.163<br>(-.171, -.155) | -.144<br>(-.151, -.136) | -.141<br>(-.148, -.133) | -.102<br>(-.118, -.086) | -.101<br>(-.116, -.085) |
| Birth year and sex                                                            | Yes                     | Yes                     | Yes                     | Yes                     | Yes                     |
| Other control variables <sup>a</sup>                                          | No                      | Yes                     | Yes                     | No                      | No                      |
| Mutually adjusted <sup>b</sup>                                                | No                      | No                      | Yes                     | No                      | Yes                     |
| Sibling fixed effects                                                         | No                      | No                      | No                      | Yes                     | Yes                     |
| N                                                                             | 318,202                 | 318,202                 | 318,202                 | 138,852                 | 138,852                 |

<sup>a</sup>Maternal age, mother tongue, parental education, family type, sibship size, region, urban–rural classification.

<sup>b</sup>Somatic conditions, frequent infections, and mental disorders were included in the model simultaneously.

**Fig A1** Predicted probabilities of completing the general track (instead of the vocational track) among those who completed upper-secondary education by age 27 (n=318,202) by parental education and the presence of mental disorders at ages 10-16. Data are adjusted for all control variables. Statistical significance of the interaction between parental education and mental disorders:  $p < .001$

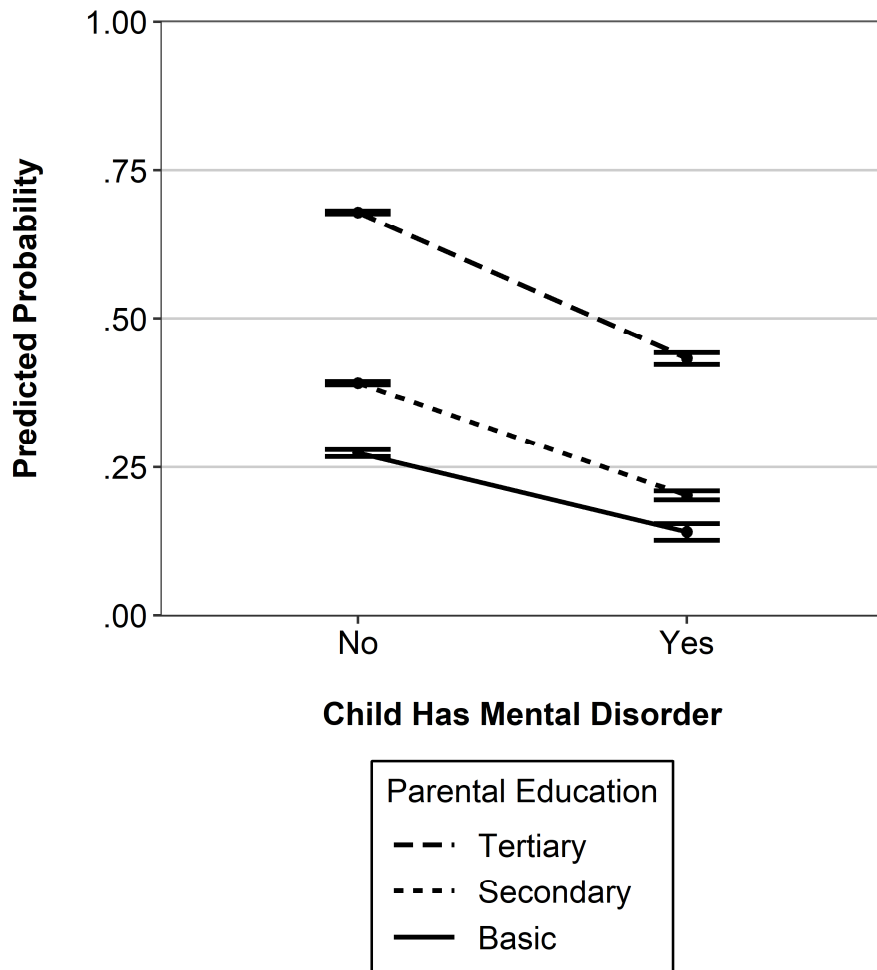

**Fig A2** Predicted probabilities of tertiary education (among those with completed secondary education, n=318,202) at age 27 by parental education, upper-secondary track-choice (general vs. vocational), and the presence of mental disorders at ages 10–16. Data are adjusted for all control variables.

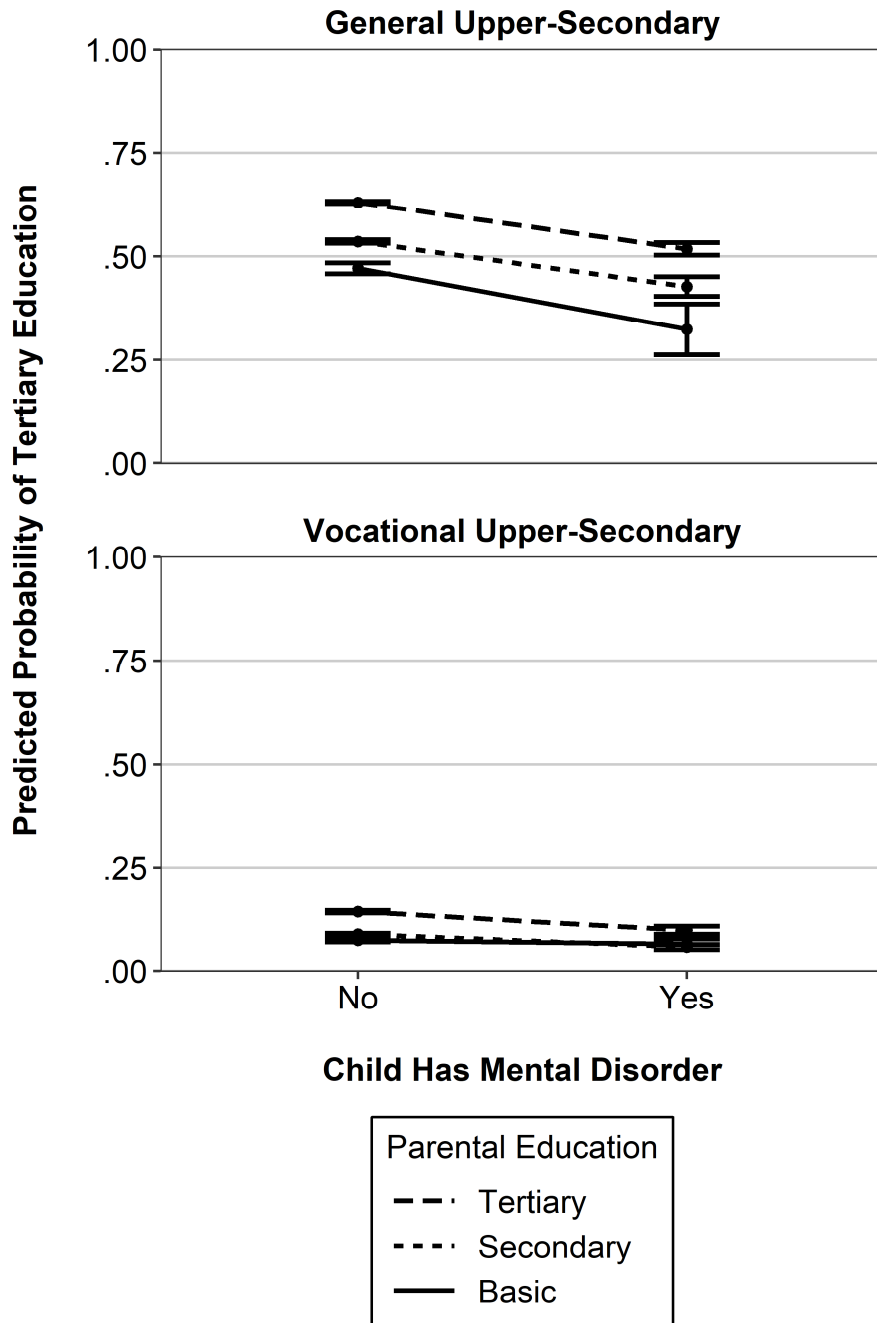

Supplement: MOESM1 [file 18440792]
